# Supplementary material for: Micro-sized porous carbon spheres with ultra-high rate capability for lithium storage
Source: Royal Society of Chemistry journal article supplement (doi:10.1039/c4nr05878j), 2014-12-01
Supplement: c4nr05878j1.pdf [file c4nr05878j1.pdf]

## Supporting Information

# Micro-sized Porous Carbon Spheres with Ultra-High Rate Capability for Lithium Storage

Meng Chen<sup>a,b,#</sup>, Chang Yu<sup>a,#</sup>, Shaohong Liu<sup>a</sup>, Xiaoming Fan<sup>a</sup>, Changtai Zhao<sup>a</sup>, Xu Zhang<sup>a</sup>, and Jieshan Qiu<sup>a,\*</sup>

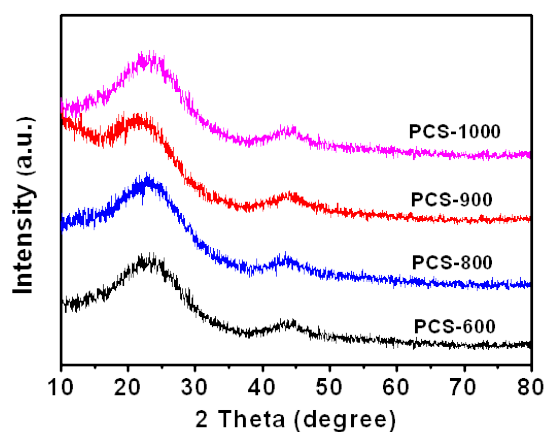

**Figure S1.** XRD patterns of the PCS samples obtained at different carbonization temperatures.

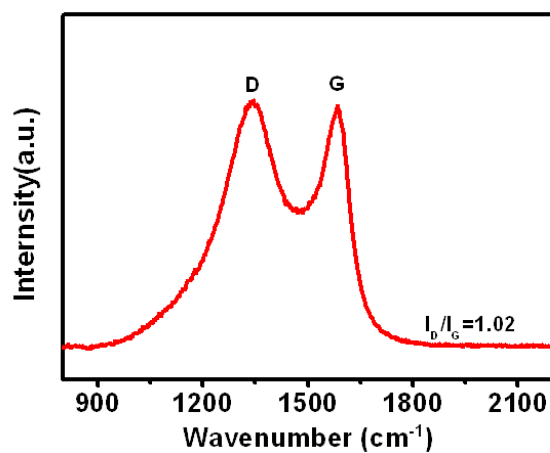

**Figure S2.** Raman spectrum of the PCS-900 sample.

**Table S1.** Pore structure parameters of the as-prepared samples.

| Sample   | $S_{\text{BET}}$               | $S_{\text{mic}}$               | $S_{\text{meso}}$              | $V_{\text{t}}$                  | $V_{\text{mic}}$                |
|----------|--------------------------------|--------------------------------|--------------------------------|---------------------------------|---------------------------------|
|          | ( $\text{m}^2 \text{g}^{-1}$ ) | ( $\text{m}^2 \text{g}^{-1}$ ) | ( $\text{m}^2 \text{g}^{-1}$ ) | ( $\text{cm}^3 \text{g}^{-1}$ ) | ( $\text{cm}^3 \text{g}^{-1}$ ) |
| PCS-600  | 364                            | 321                            | 43                             | 0.182                           | 0.125                           |
| PCS-800  | 432                            | 396                            | 46                             | 0.185                           | 0.156                           |
| PCS-900  | 559                            | 490                            | 69                             | 0.239                           | 0.192                           |
| PCS-1000 | 90                             | 67                             | 23                             | 0.049                           | 0.026                           |

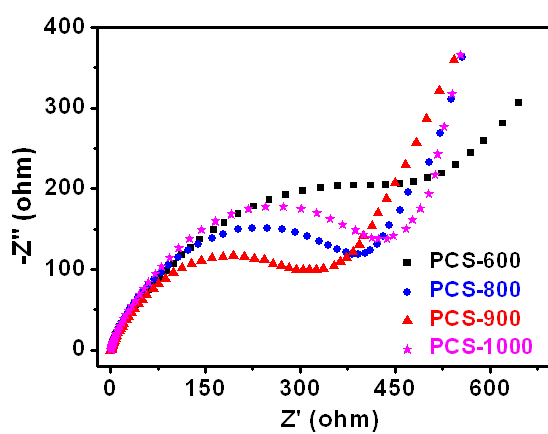

**Figure S3.** Nyquist plots of the PCS electrodes obtained by applying a sine wave with amplitude of 5.0 mV over the frequency range 100 kHz-0.005 Hz.

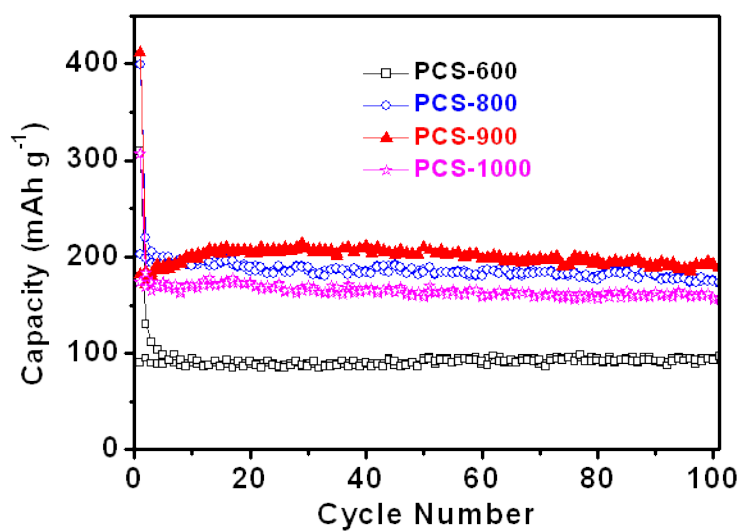

**Figure S4.** Cycling performance of the PCS samples at a large current density of 10 A  $\text{g}^{-1}$ .

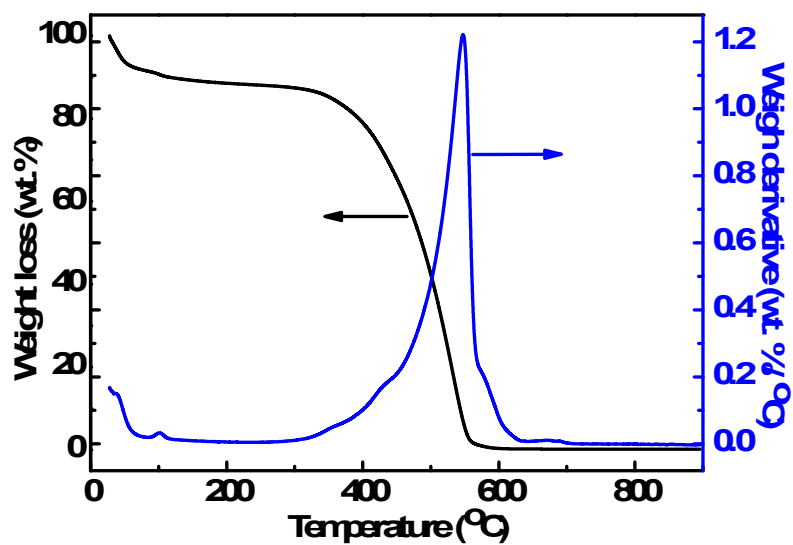

**Figure S5.** TG and DTG curves of the PCS-900, indicative of very low ash content.
